# Supplementary material for: Pregnenolone Bioproduction in Engineered Methylobacteria: Design and Elaboration
Source: MDPI journal article supplement (doi:10.3390/ijms262210975), 2025-11-13
Supplement: s1 [file Figure S1.pdf › Figure S1.pdf]

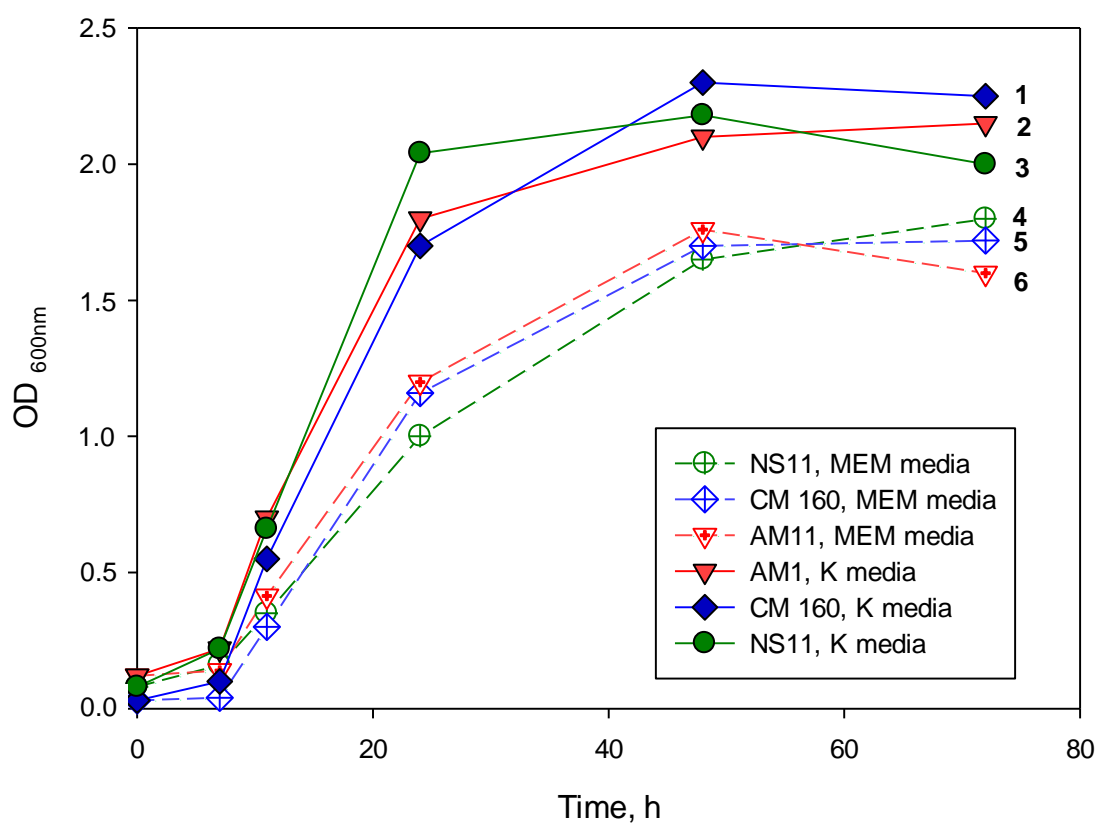

Figure S1. *M. extorquens* strains growth curves in K medium (1-3) and in MEM medium (4-6): 3, 4 – *M. extorquens* NS11; 1, 5 – *M. extorquens* CM 160; 2, 6 – *M. extorquens* AM1 (parental strain). The experiments were carried out three times, the experimental error was calculated the standard deviation.
