# Supplementary material for: Pregnenolone Bioproduction in Engineered Methylobacteria: Design and Elaboration
Source: MDPI journal article supplement (doi:10.3390/ijms262210975), 2025-11-13
Supplement: s1 [file Figure S2.pdf › Figure S2.pdf]

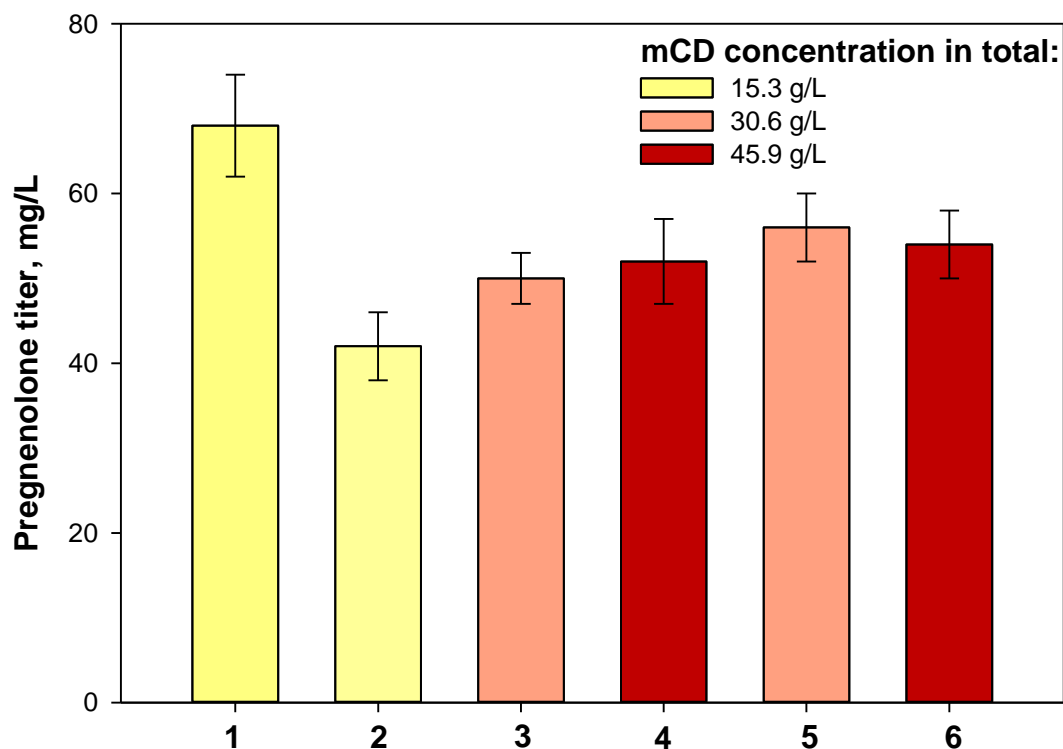

Figure S2. The influence of mCD addition regimen on pregnenolone production by *M. extorquens* NS11: 1 – control (the addition of mCD at the 1<sup>st</sup> day of bioconversion, molar ratio - 1:1.5, 15.3 g/L mCD), 2 – the addition on the 2<sup>nd</sup> day of growth (molar ratio - 1:1.5, 15.3 g/L mCD); 3 – the addition on the 1<sup>st</sup> and 2<sup>nd</sup> days (total molar ratio – 1:3, 30.6 g/L mCD); 4 - the addition on the 1<sup>st</sup>, 2<sup>nd</sup> and 4<sup>th</sup> days (total molar ratio - 1:4.5, 45.9 g/L mCD); 5 – the addition on the 1<sup>st</sup> and 4<sup>th</sup> days (total molar ratio – 1:3, 30.6 g/L mCD); 6 – the addition on the 1<sup>st</sup> and 4<sup>th</sup> days double dose (molar ratio – 1:4.5, 45.9 g/L mCD. The initial cholesterol concentration was 3 g/L, the data presented for 11<sup>th</sup> day of bioconversion.
